# Supplementary material for: Vertical recrystallization for highly efficient and stable formamidinium-based inverted-structure perovskite solar cells
Source: Royal Society of Chemistry journal article supplement (doi:10.1039/c7ee01675a), 2017-01-01
Supplement: c7ee01675a1.pdf [file c7ee01675a1.pdf]

## Electronic Supplementary Information

### Vertical Recrystallization for Highly Efficient and Stable Formamidinium based Inverted Structure Perovskite Solar Cells

*Fengxian Xie<sup>a</sup>, Chun-Chao Chen<sup>b</sup>, Yongzhen Wu<sup>a</sup>, Xing Li<sup>a</sup>, Molang Cai<sup>a</sup>, Xiao Liu<sup>a</sup>, Xudong Yang<sup>b</sup>, and Liyuan Han<sup>a\*</sup>*

<sup>a</sup>Research Network and Facility Services Division, National Institute for Materials Science, Tsukuba, Ibaraki 305–0047, Japan

<sup>b</sup>State Key Laboratory of Metal Matrix Composites, Shanghai Jiao Tong University, 800 Dong Chuan RD., Shanghai 200240, China.

\*E-mail: HAN.Liyuan@nims.go.jp

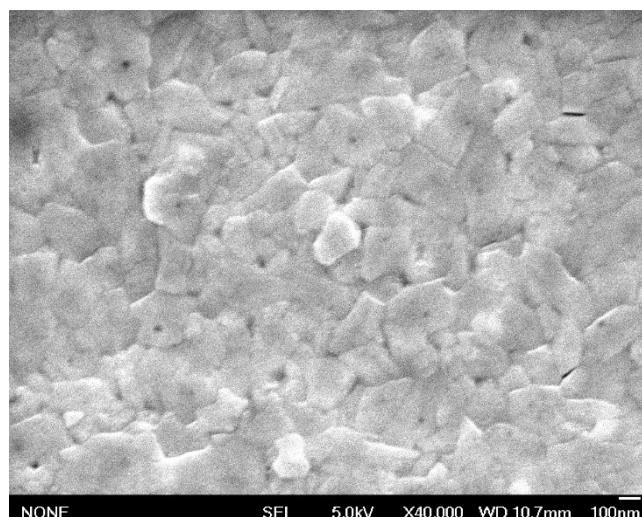

**Figure S1.** SEM image of FAPbI<sub>3</sub> film without annealing (  $\delta$ -FAPbI<sub>3</sub> film). The crystal size is around 100 nm.

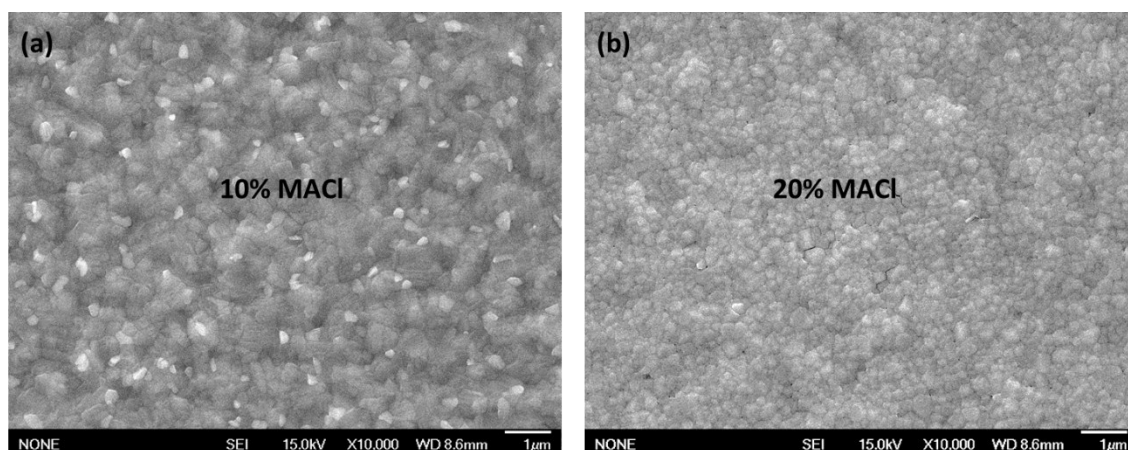

**Figure S2.** SEM image of perovskite film formed by mixed FAPbI<sub>3</sub>+MACl in precursor solution. (a) FAPbI<sub>3</sub>(MACl 10%), (b) FAPbI<sub>3</sub>(MACl 20%). The perovskite films were thermal annealed at 100°C for 10 min and then annealed at 140°C for 20min.

Different from MACl vertical recrystallization method, the perovskite film formed by the mixed FAPbI<sub>3</sub>+MACl method showed small perovskite grains (about 200nm), which is consistent with previous report.<sup>[1]</sup>

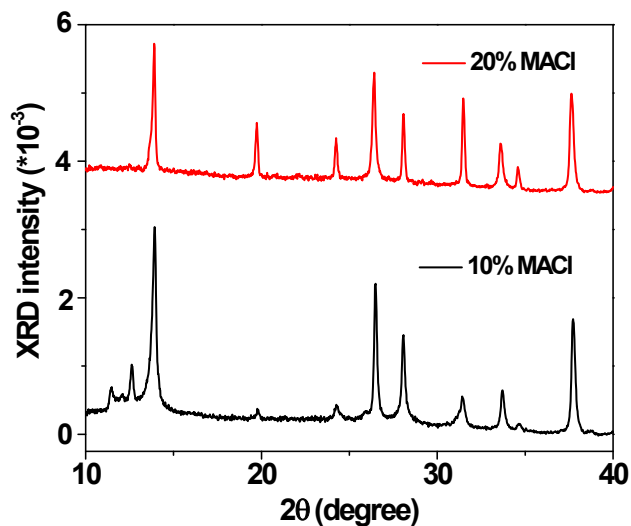

**Figure S3.** XRD spectrum of perovskite film formed by mixed FAPbI<sub>3</sub>/MACl. (a) FAPbI<sub>3</sub>(MACl 10%), (b) FAPbI<sub>3</sub>(MACl 20%). The perovskite films were thermal annealed at 100°C for 10 min and then annealed at 140°C for 20min. Different from MACl vertical recrystallization method, the perovskite film formed by the mixed FAPbI<sub>3</sub>+MACl method showed very weak XRD peak.

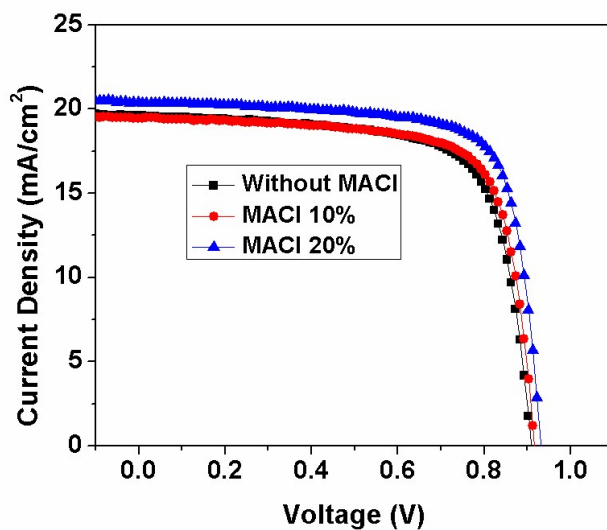

**Figure S4.** Current density-voltage (J-V) curves FAPbI<sub>3</sub> perovskite device using pristine-FAPbI<sub>3</sub> film (black square dots line), mixed FAPbI<sub>3</sub>+MACl 10% (red rounded dots line), and mixed FAPbI<sub>3</sub>+MACl 20% (blue triangle dots line). The perovskite films were thermal annealed at 100°C for 10 min and then annealed at 140°C for 20min.

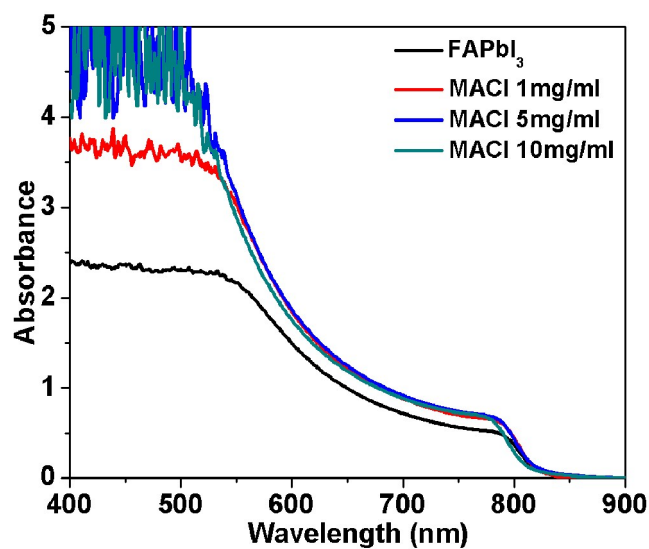

**Figure S5.** Absorbance spectra of FAPbI<sub>3</sub> film with different MACl concentration treatment.

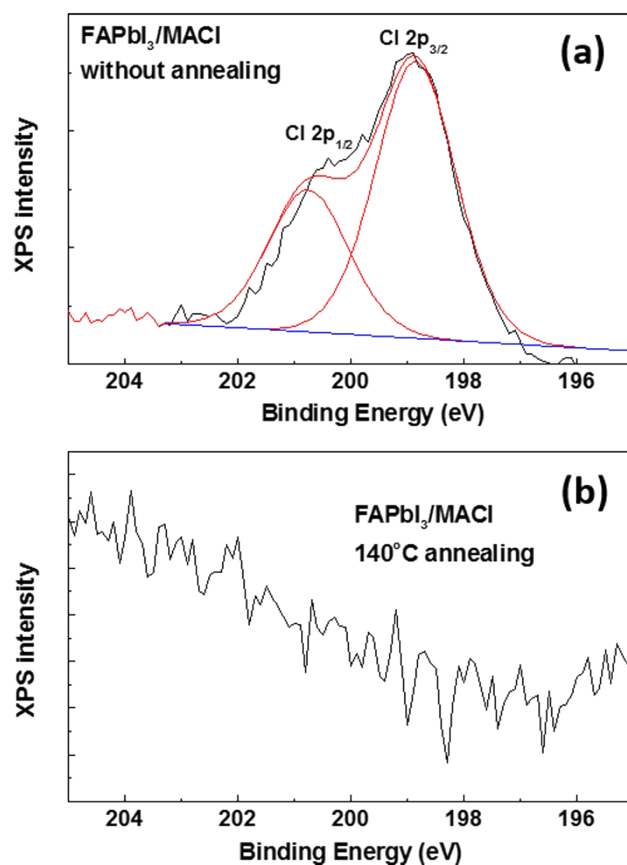

**Figure S6.** XPS spectra (Cl 2p core level) of (a) a FAPbI<sub>3</sub> perovskite film with 10 mg/ml MACl spin-coated on top surface without thermal annealing. (b) a FAPbI<sub>3</sub> perovskite film with 10 mg/ml MACl treatment after thermal annealing at 100°C for 10 min and 140°C for 20 min, indicated little amount of Cl was remained in the perovskite film.

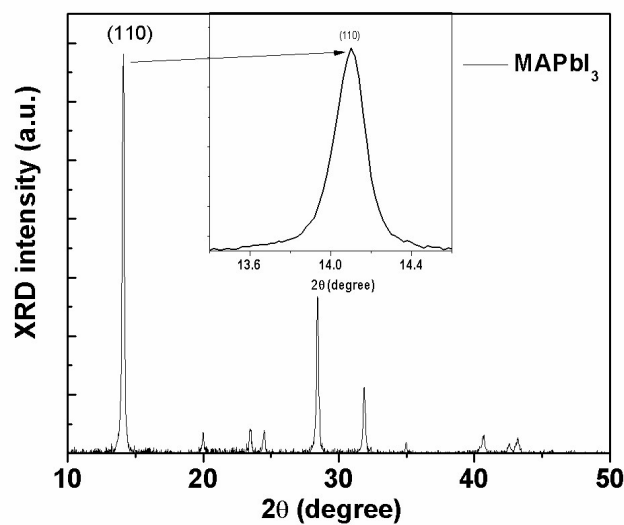

**Figure S7.** X-ray diffraction pattern of MAPbI<sub>3</sub> film.

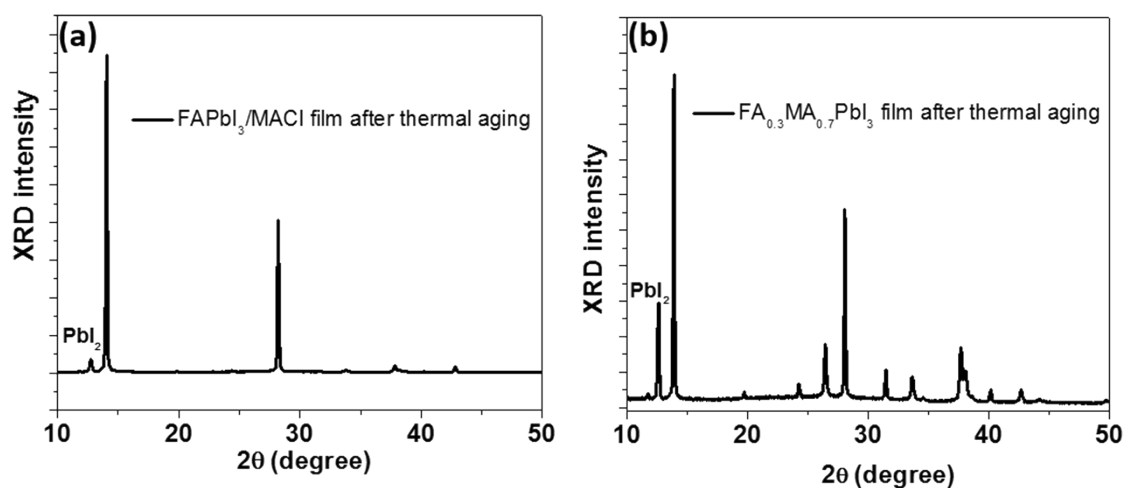

**Figure S8.** (a) XRD spectrum of thermal aged perovskite film (Vertical recrystallization method, FAPbI<sub>3</sub>/MACI 5mg/ml). (b) XRD spectrum of thermal aged perovskite film (FA<sub>0.3</sub>MA<sub>0.7</sub>PbI<sub>3</sub> by reported method<sup>[2]</sup>). Thermal aging of perovskite films were performed at 100°C on hot plate for 50 hours in glove box.

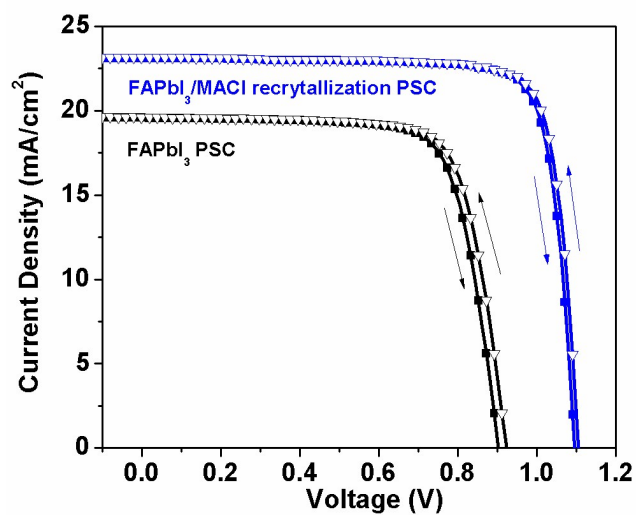

**Figure S9** Hysteresis behavior of pristine FAPbI<sub>3</sub>-based PSC and FAPbI<sub>3</sub>/MACl (5 mg/ml) based inverted PSC.

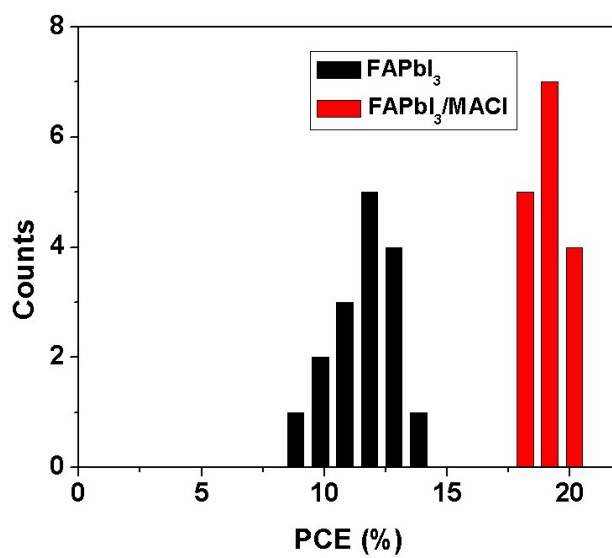

**Figure S10.** Statistical PCE of of the pristine FAPbI<sub>3</sub>-based PSC and FAPbI<sub>3</sub>/MACl (5 mg/ml) based inverted PSC.

**Table S1.** Photovoltaic data obtained from FAPbI<sub>3</sub> perovskite device with 0mg/ml, 1mg/ml, 5 mg/ml and 10mg/ml MACl treatment.

|              | V <sub>oc</sub> (V) | J <sub>sc</sub> (mA/cm <sup>2</sup> ) | FF    | PCE % |
|--------------|---------------------|---------------------------------------|-------|-------|
| without MACl | 0.91                | 19.57                                 | 0.741 | 13.24 |
| MACl 1mg/ml  | 1.02                | 20.49                                 | 0.751 | 15.72 |
| MACl 5mg/ml  | 1.10                | 23.09                                 | 0.814 | 20.65 |
| MACl 10mg/ml | 1.09                | 22.51                                 | 0.811 | 19.89 |

**Table S2.** Summary of lattice parameters for perovskite films

| Perovskite film    | XRD (110) | lattice parameter |
|--------------------|-----------|-------------------|
| FAPbI <sub>3</sub> | 13.86     | 6.384             |
| 1mg/ml MACl        | 13.88     | 6.375             |
| 5mg/ml MACl        | 13.90     | 6.366             |
| 10mg/ml MACl       | 13.96     | 6.339             |
| MAPbI <sub>3</sub> | 14.10     | 6.276             |

Reference:

- [1] Z. Wang, Y. Zhou, S. Pang, Z. Xiao, J. Zhang, W. Chai, H. Xu, Z. Liu, N. P. Padture, G. Cui, Chemistry of Materials 2015, 27, 7149.
- [2] J. Liu, Y. Shirai, X. Yang, Y. Yue, W. Chen, Y. Wu, A. Islam, L. Han, Advanced Materials 2015, 27, 4918.
